# Supplementary material for: ATG14 targets lipid droplets and acts as an autophagic receptor for syntaxin18-regulated lipid droplet turnover
Source: PubMed Central journal article supplement (PMC10799895; doi:10.1038/s41467-024-44978-w), 2024-01-20
Supplement: 41467_2024_44978_MOESM1_ESM.pdf [file 41467_2024_44978_MOESM1_ESM.pdf]

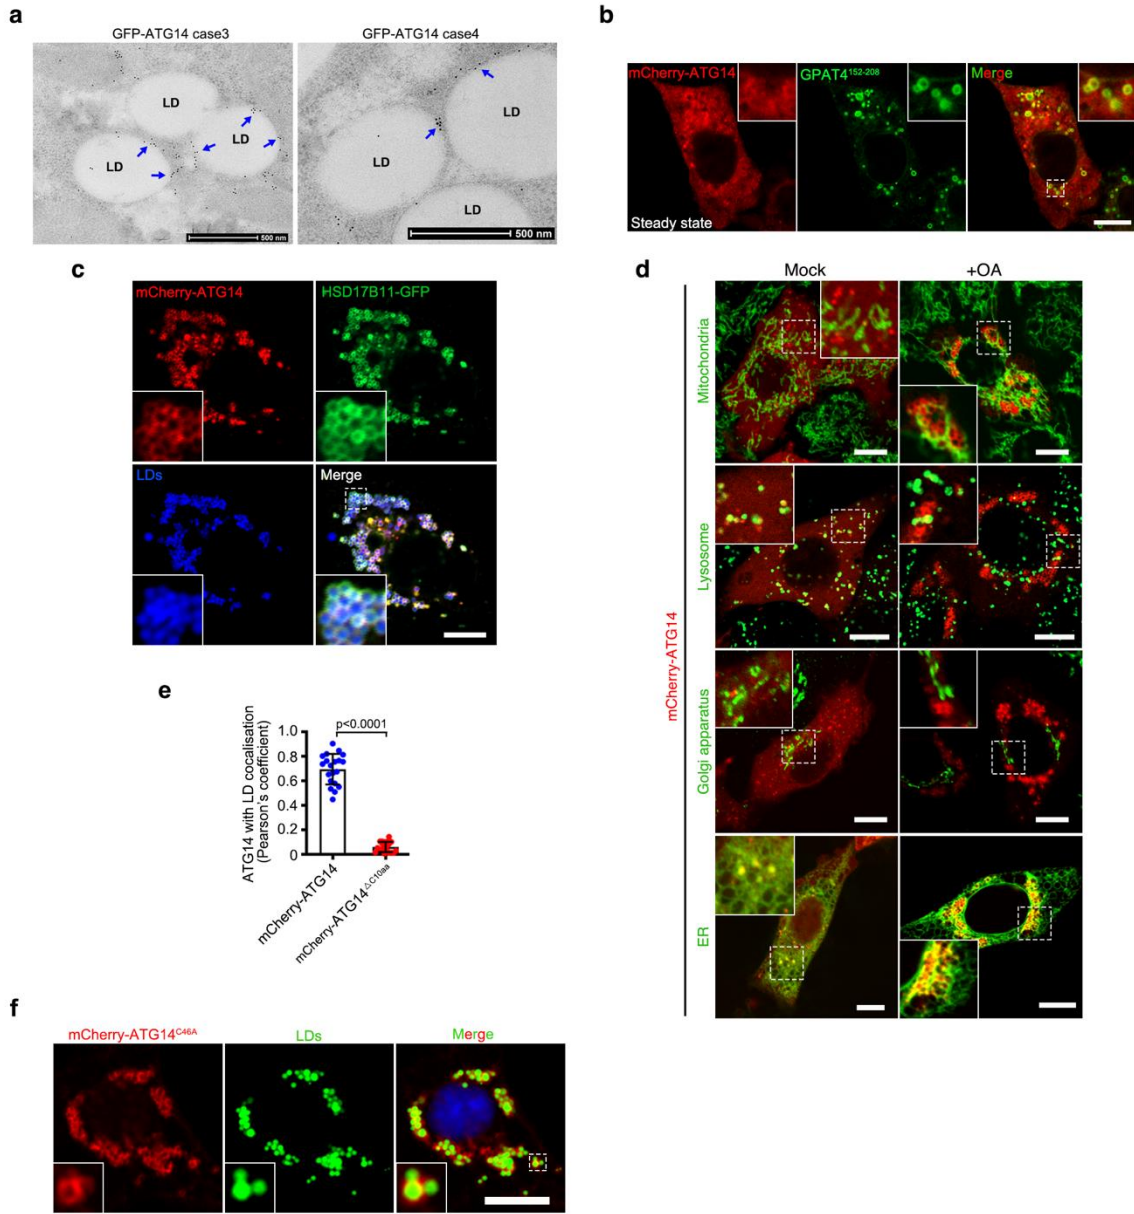

2 **Figure S1. ATG14 targets LDs.**

3 **(a)** Representative immune-gold TEM images of cells expressed with GFP-ATG14 and  
4 treated with OA for 12 h. Blue arrows mark GFP-ATG14 dots are enriched on the surface  
5 of LDs. Scar bar represents 500 nm. **(b)** HeLa cells expressing mCherry-ATG14 and GFP-  
6 GPAT4<sup>152-208</sup> were fixed. Cells were imaged by confocal microscopy. Scar bar represents  
7 10  $\mu$ m. **(c)** HeLa cells expressing HSD17B11-GFP and mCherry-ATG14 were treated with  
8 200  $\mu$ M OA for 12 h, then fixed and labeled the LDs with LipidTOX Deep Red (blue). Cells  
9 were imaged by confocal microscopy. Scar bar represents 10  $\mu$ m. **(d)** Co-localizations  
10 between mCherry-ATG14 and mitochondria (anti-Tom20), or Lysosomes (anti-LAMP2) or  
11 Golgi (anti-GM130) or ER (GFP-RAMP4) were analyzed via confocal microscopy. Scar bar  
12 represents 10  $\mu$ m. **(e)** Colocalization of mCherry-ATG14 or mCherry-ATG14 $\Delta$ <sup>10aa</sup> and LDs  
13 (Pearson's Coefficient), n=20 cells. Error bars, mean  $\pm$  SD of three independent  
14 experiments. Two-tailed Unpaired Student's t-test. **(f)** HeLa cells expressing mCherry-  
15 ATG14<sup>C46A</sup> were treated with 200  $\mu$ M OA for 12 h, then fixed and labeled the LDs with  
16 BODIPY-493/503 (green). The nuclei were stained with DAPI. Cells were imaged by  
17 confocal microscopy. Scar bar represents 10  $\mu$ m. Source data are provided as a Source  
18 Data file.

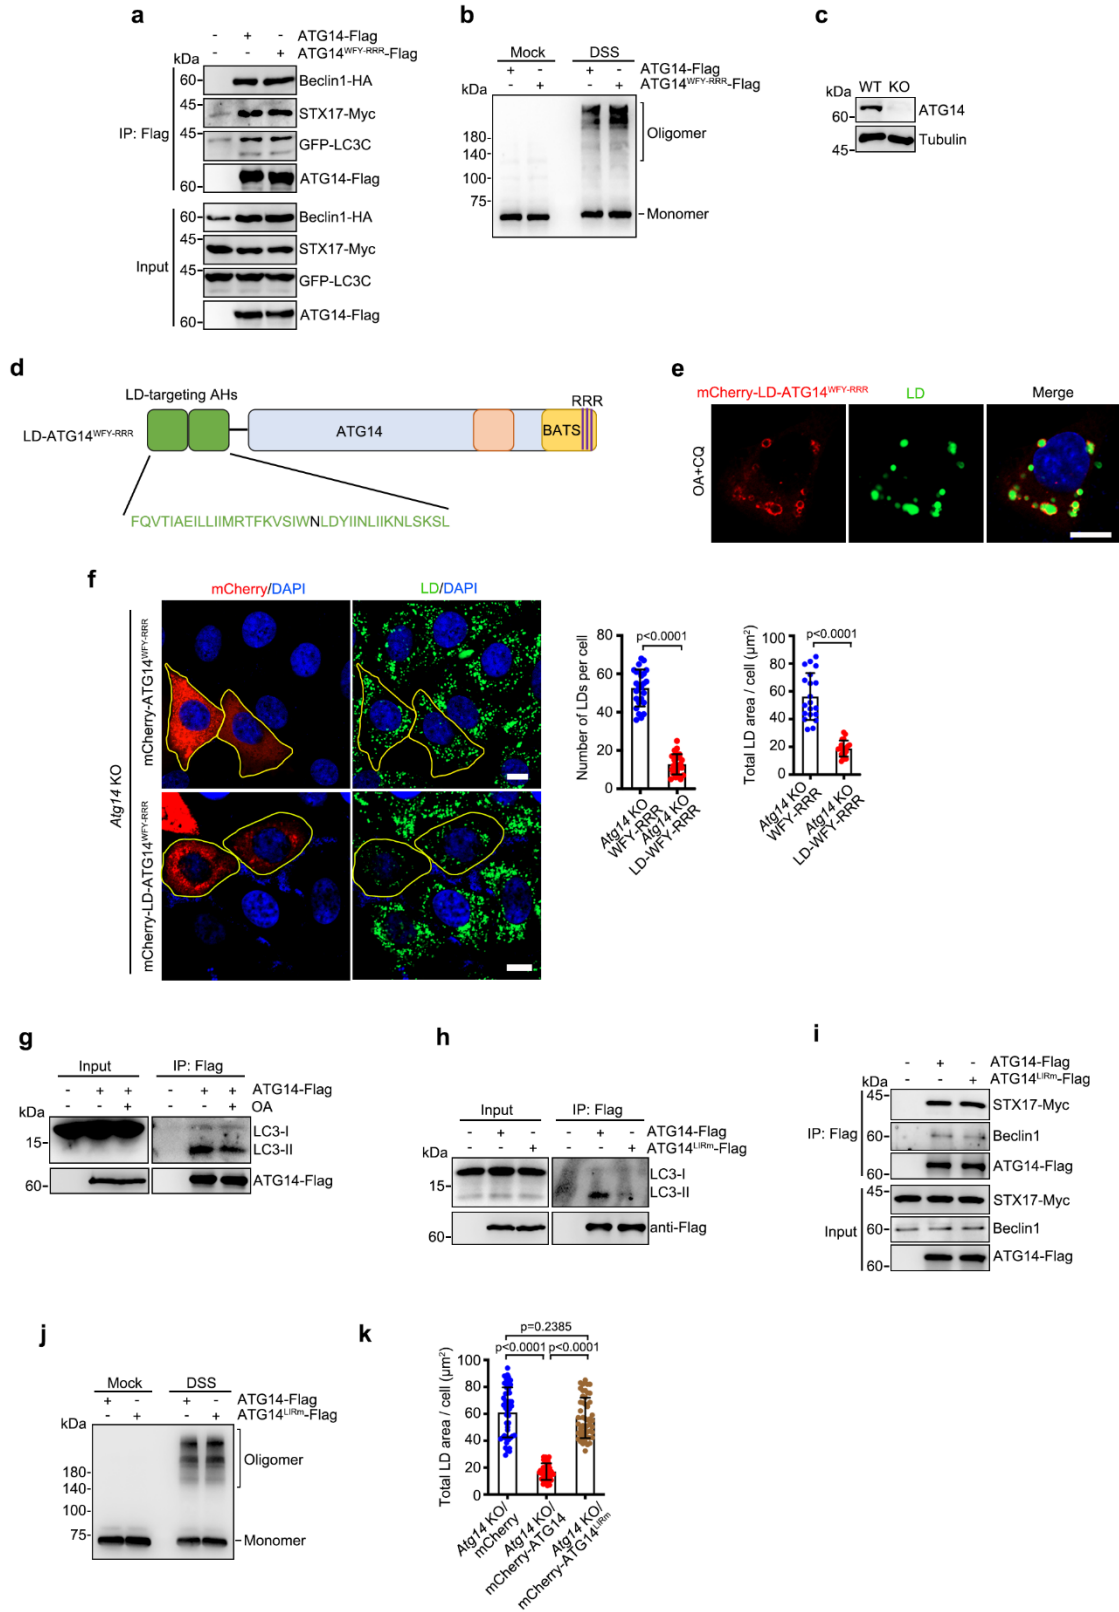

20 **Figure S2. ATG14 overexpression induces lipophagy.**

21 **(a)** The Flag tagged ATG14 or ATG14<sup>WFY-RRR</sup> was co-expressed in HEK293T cells with  
22 GFP-LC3C, STX17-Myc and Beclin1-HA. Protein interactions were detected by  
23 immunoprecipitation with anti-Flag beads and immunoblotting analysis. **(b)** HEK293T cells  
24 were transfected with ATG14-Flag or ATG14<sup>WFY-RRR</sup>-Flag for 36 h and treated with 0.2 mM  
25 DSS for 30 min before collecting. Cell lysates were analyzed via western blot. **(c)** *Atg14*  
26 wild type and knockout HeLa cells were analyzed via immunoblotting analysis. **(d)** The  
27 design of LD-resident ATG14<sup>WFY-RRR</sup> protein was shown. **(e)** HeLa cells expressing  
28 mCherry-LD-ATG14<sup>WFY-RRR</sup> were treated with OA for 12 h and CQ for 6 h, then fixed and  
29 labeled the LDs with BODIPY-493/503 (green). The nuclei were stained with DAPI. **(f)**  
30 *Atg14* knockout HeLa cells expressing mCherry-ATG14<sup>WFY-RRR</sup> or mCherry-LD-ATG14<sup>WFY-</sup>  
31 <sup>RRR</sup> were treated with 200  $\mu$ M OA for 6 h, then fixed and labeled the LDs with BODIPY-  
32 493/503 (green). The nuclei were stained with DAPI. Cells were imaged by confocal  
33 microscopy. Scar bar represents 10  $\mu$ m. Number (n=25) and total area (n=20) of LDs in  
34 each cell was counted from three independent experiments. Error bars, mean  $\pm$  SD. Two-  
35 tailed Unpaired Student's t-test. **(g)** The Flag tagged ATG14 was expressed in HEK293T  
36 cells and cells were further treated with or without 200  $\mu$ M OA for 12 h. Protein interactions  
37 between ATG14-Flag and endogenous LC3 were detected by immunoprecipitation with  
38 anti-Flag beads and immunoblotting analysis. **(h)** The Flag tagged ATG14 or ATG14<sup>LIRm</sup>  
39 was expressed in HEK293T cells. Protein interactions between ATG14-Flag and  
40 endogenous LC3 were detected by immunoprecipitation with anti-Flag beads and  
41 immunoblotting analysis. **(i)** The Flag tagged ATG14 or ATG14<sup>LIRm</sup> was co-expressed in  
42 HEK293T cells with STX17-Myc. Protein interactions between ATG14-Flag and STX17-

43 Myc or endogenous Beclin1 were detected by immunoprecipitation with anti-Flag beads  
44 and immunoblotting analysis. **(j)** HEK293T cells were transfected with ATG14-Flag or  
45 ATG14<sup>LIRm</sup>-Flag for 36 h and treated with 0.2 mM DSS for 30 min before collecting. Cell  
46 lysates were analyzed via western blot. **(k)** Total area of LDs in each cell in **(Fig. 2n)** was  
47 counted from 50 cells of three independent experiments. Error bars, mean  $\pm$  SD. Two-tailed  
48 Unpaired Student's t-test. Source data are provided as a Source Data file.

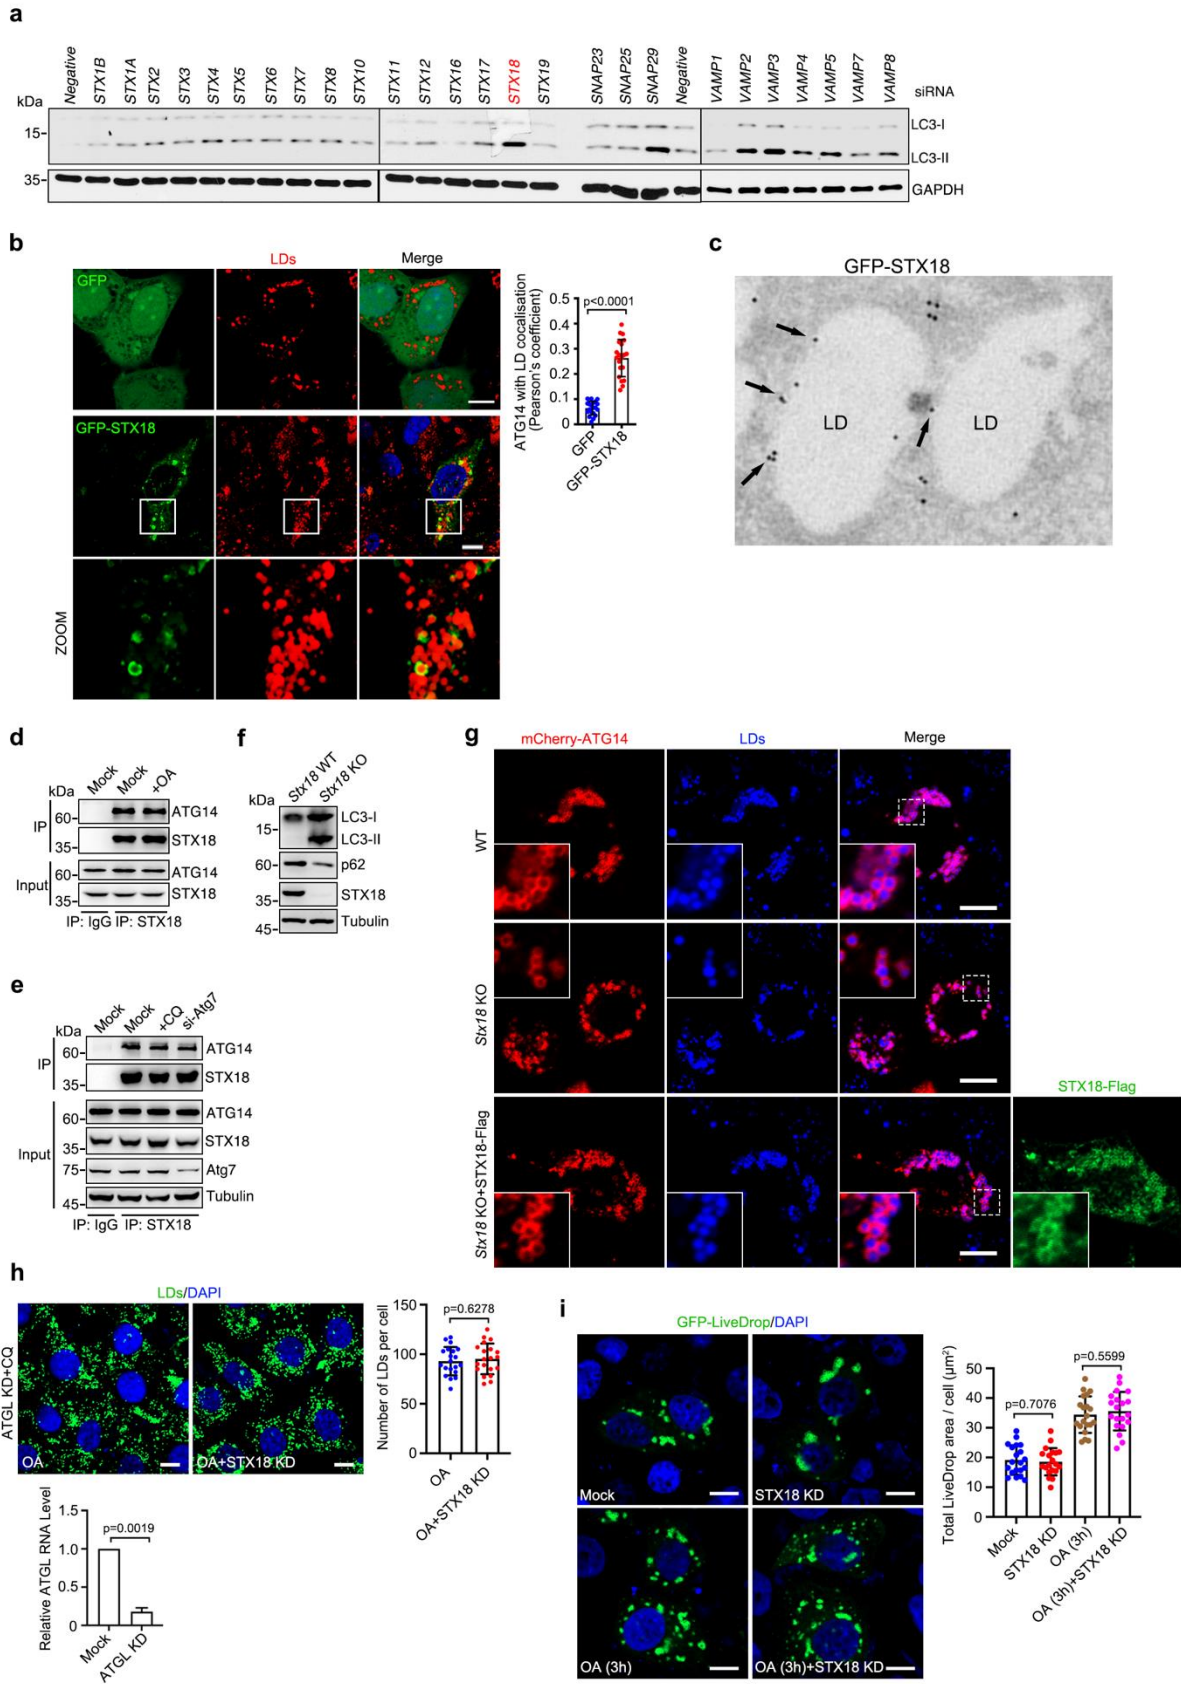

50 **Figure S3. STX18 targets LDs.**

51 **(a)** Cells were treated with negative or indicated siRNAs for 48 h. Cell lysates were  
52 analyzed via western blot. **(b)** HeLa cells expressing GFP or GFP-STX18 were treated  
53 with 200  $\mu$ M OA for 12 h, then fixed and labeled the LDs with LipidTOX Red (red). The  
54 nuclei were stained with DAPI. Cells were imaged by confocal microscopy. Scar bar  
55 represents 10  $\mu$ m. Colocalization of LDs with GFP (20 cells) or GFP-STX18 (20 cells)  
56 (Pearson's Coefficient) were analyzed. Error bars, mean  $\pm$  SD of three independent  
57 experiments. Two-tailed Unpaired Student's t-test. **(c)** Low magnification immunogold  
58 electron micrograph of GFP-STX18 transfected HepG2 cells. Black arrows mark GFP-  
59 STX18 dots are enriched on the surface of LDs. **(d)** HEK293T cells were treated with or  
60 without OA for 12 h. Protein interactions were detected by immunoprecipitation with anti-  
61 IgG or STX18 antibodies and immunoblotting analysis. **(e)** HEK293T cells were  
62 transfected with or without si-Atg7, and treated with or without CQ for 6 h. Protein  
63 interactions were detected by immunoprecipitation with anti-IgG or STX18 antibodies and  
64 immunoblotting analysis. **(f)** *Stx18* wild type and knockout HeLa cells were analyzed via  
65 immunoblotting analysis. **(g)** *Stx18* wild type and knockout HeLa cells co-expressing  
66 vector or STX18-Flag with mCherry-ATG14 were treated with 200  $\mu$ M OA for 12 h, then  
67 fixed and labeled the LDs with LipidTOX Deep Red (blue). Cells were imaged by confocal  
68 microscopy. Scar bar represents 10  $\mu$ m. **(h)** HeLa cells were transfected with ATGL  
69 or/and STX18 siRNA for 48 h, and treated with 200  $\mu$ M OA and CQ for 6 h. LDs were  
70 labeled with BODIPY-493/503 (green). The nuclei were stained with DAPI. Cells were  
71 imaged by confocal microscopy. Scar bar represents 10  $\mu$ m. Number of LDs in each cell  
72 was counted from 20 cells of three independent experiments. qPCR assays confirmed

73 the efficiency of siRNAs-mediated ATGL suppression in HeLa cells (n=2). Error bars,  
74 mean  $\pm$  SD. Two-tailed Unpaired Student's t-test. **(i)** HeLa cells expressing GFP-LiveDrop  
75 were transfected with or without STX18 siRNA for 48 h, and treated with or without 200  
76  $\mu$ M OA for 3 h. The nuclei were stained with DAPI. Cells were imaged by confocal  
77 microscopy. Scar bar represents 10  $\mu$ m. Total area (n=20) of LiveDrop in each cell was  
78 counted from three independent experiments. Error bars, mean  $\pm$  SD. Two-tailed  
79 Unpaired Student's t-test. Source data are provided as a Source Data file.



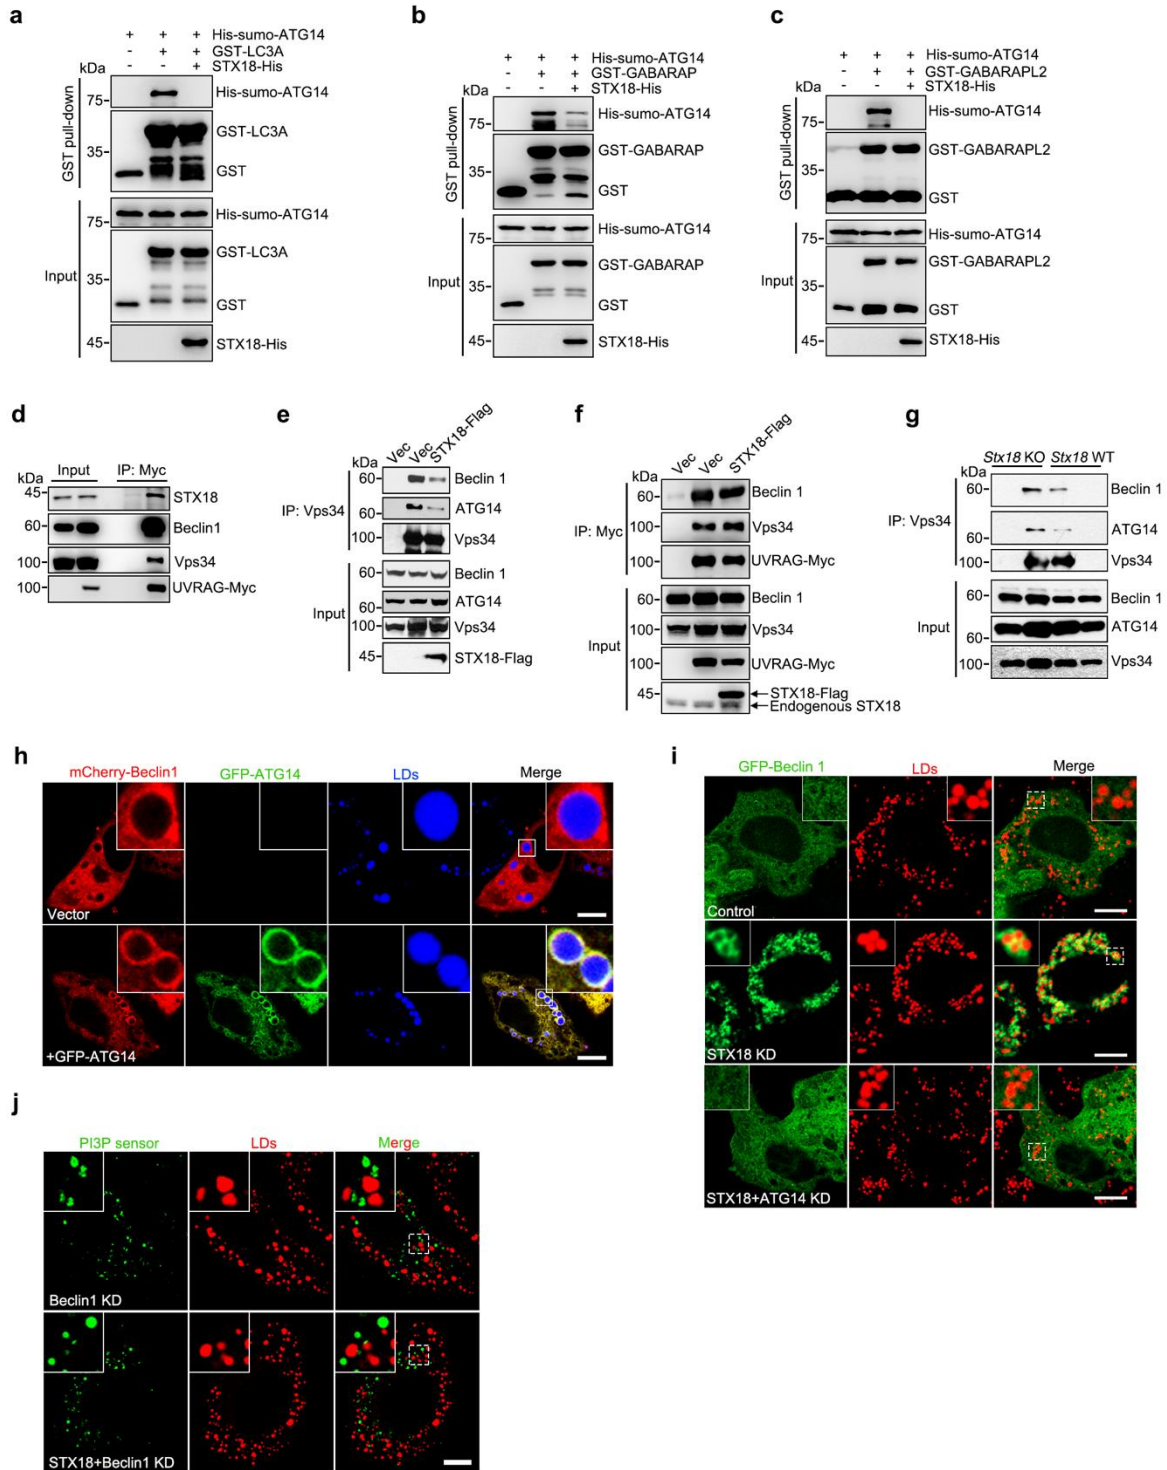

81 **Figure S4. STX18 interacts with ATG14 and subverts ATG14-LC3 interaction and**  
82 **acts as a negative regulator of PI3KC3-C1 complex.**

83 **(a)** The effect of STX18 on the interaction of LC3A with ATG14 was detected by *in vitro*  
84 GST pull-down. **(b)** The effect of STX18 on the interaction of GABARAP with ATG14 was  
85 detected by *in vitro* GST pull-down. **(c)** The effect of STX18 on the interaction of  
86 GABARAPL2 with ATG14 was detected by *in vitro* GST pull-down. **(d)** HEK293T cells  
87 were transfected with UVRAG-Myc for 36 h. Protein interactions were detected by  
88 immunoprecipitation with anti-Myc beads and immunoblotting analysis. **(e)** HEK293T  
89 cells were transfected with or without STX18-Flag for 36 h. Cells were subjected to Vps34  
90 IP and analyzed via western blot. **(f)** HEK293T cells were transfected with UVRAG-Myc  
91 with or without STX18-Flag for 36 h. Protein interactions were detected by  
92 immunoprecipitation with anti-Myc beads and immunoblotting analysis. **(g)** *Stx18* wild  
93 type and knockout HEK293T cells were subjected to Vps34 IP and analyzed via western  
94 blot. **(h)** HeLa cells expressing mCherry-Beclin1 with or without GFP-ATG14 were treated  
95 with 200  $\mu$ M OA for 12 h, then fixed and labeled the LDs with LipidTOX Deep Red (blue).  
96 Cells were imaged by confocal microscopy. Scar bar represents 10  $\mu$ m. **(i)** HeLa cells  
97 expressing GFP-Beclin1 were transfected with STX18 or/and ATG14 siRNA for 48 h and  
98 treated with 200  $\mu$ M OA for 12 h, then fixed and labeled the LDs with LipidTOX Red (red).  
99 Cells were imaged by confocal microscopy. Scar bar represents 10  $\mu$ m. **(j)** HeLa cells  
100 expressing GFP-FYVE<sub>SARA</sub> were transfected with pSUPER-shBeclin1 or/and STX18  
101 siRNA for 48 h, and treated with 200  $\mu$ M OA for 12 h. LDs were labeled with LipidTOX  
102 Red (red). Cells were imaged by confocal microscopy. Scar bar represents 10  $\mu$ m. Source  
103 data are provided as a Source Data file.

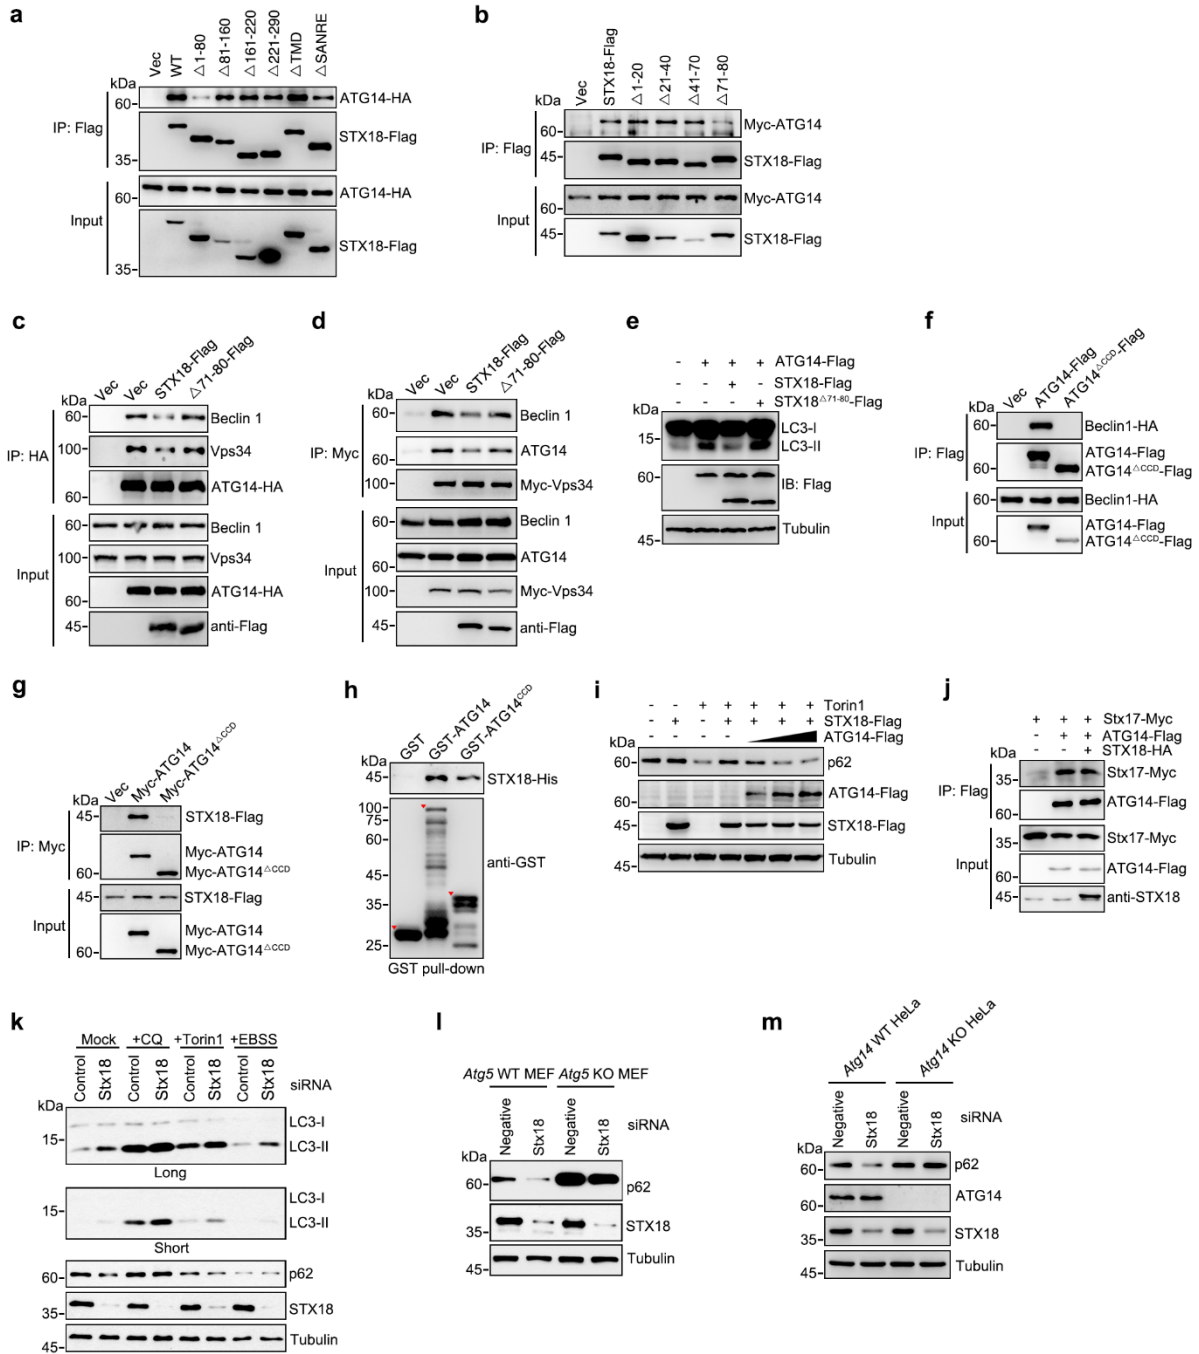

105 **Figure S5. STX18 disrupts the formation of PI3KC3-C1 complex by competitively**  
106 **binding the CCD in ATG14.**

107 **(a)** HEK293T cells were transfected with ATG14-HA and STX18-Flag or its mutants for  
108 36 h. Protein interactions were detected by immunoprecipitation with anti-Flag beads and  
109 immunoblotting analysis. **(b)** HEK293T cells were transfected with Myc-ATG14 and  
110 STX18-Flag or its mutants for 36 h. Protein interactions were detected by  
111 immunoprecipitation with anti-Flag beads and immunoblotting analysis. **(c)** HEK293T  
112 cells were transfected with ATG14-HA and STX18-Flag or its mutant for 36 h. Protein  
113 interactions were detected by immunoprecipitation with anti-HA beads and  
114 immunoblotting analysis. **(d)** HEK293T cells were transfected with Myc-Vps34 and  
115 STX18-Flag or its mutant for 36 h. Protein interactions were detected by  
116 immunoprecipitation with anti-Myc beads and immunoblotting analysis. **(e)** HEK293T  
117 cells were transfected with ATG14-Flag and STX18-Flag or its mutant for 36 h. Cell  
118 lysates were analyzed via western blot. **(f)** HEK293T cells were transfected with Beclin1-  
119 HA and ATG14-Flag or ATG14<sup>ΔCCD</sup>-Flag for 36 h. Protein interactions were detected by  
120 immunoprecipitation with anti-Flag beads and immunoblotting analysis. **(g)** HEK293T  
121 cells were transfected with STX18-Flag and Myc-ATG14 or Myc-ATG14<sup>ΔCCD</sup> for 36 h.  
122 Protein interactions were detected by immunoprecipitation with anti-Myc beads and  
123 immunoblotting analysis. **(h)** The protein interactions of GST tagged ATG14 or ATG14<sup>CCD</sup>  
124 with His tagged STX18 were detected by GST pull-down experiments. **(i)** HEK293T cells  
125 expressing ATG14-Flag and STX18-Flag were treated with Torin1. Cell lysates were  
126 analyzed via western blot. **(j)** HEK293T cells were transfected with ATG14-Flag, STX17-  
127 Myc, with or without STX18-HA for 36 h. Protein interactions were detected by

128 immunoprecipitation with anti-Flag beads and immunoblotting analysis. **(k)** U2OS cells  
129 were transfected with control or STX18 siRNA for 48 h and then treated with CQ or EBSS  
130 starvation for 2 h and treated with Torin1 for 4 h. Cell lysates were analyzed via western  
131 blot. **(l)** *Atg5* wild type and knockout MEF were treated with control or STX18 siRNA for  
132 48 h. Cell lysates were analyzed via western blot. **(m)** *Atg14* wild type and knockout HeLa  
133 were treated with control or STX18 siRNA for 48 h. Cell lysates were analyzed via western  
134 blot. Source data are provided as a Source Data file.

**a**

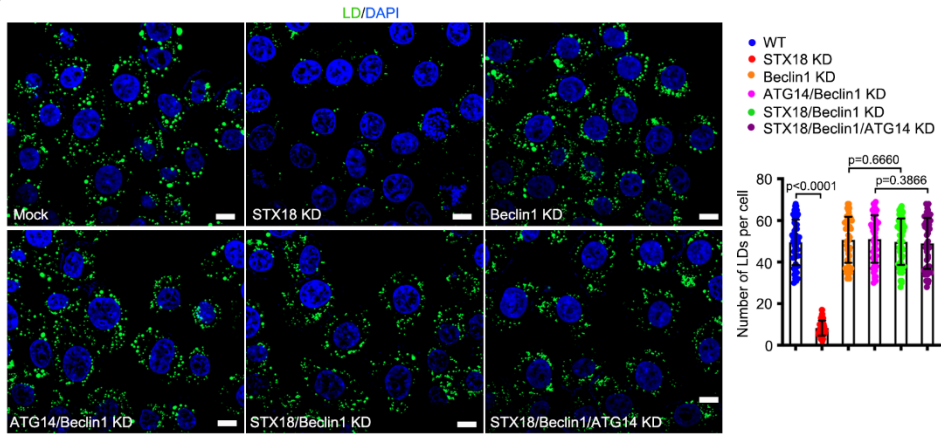

**b**

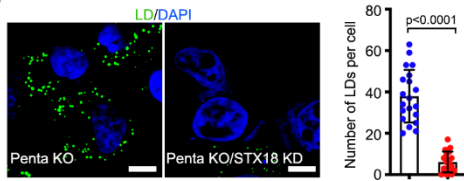

**c**

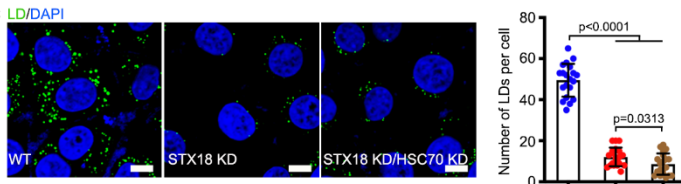

**d**

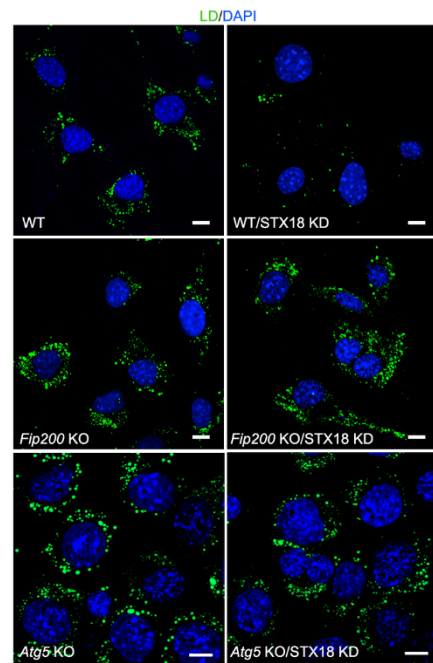

**e**

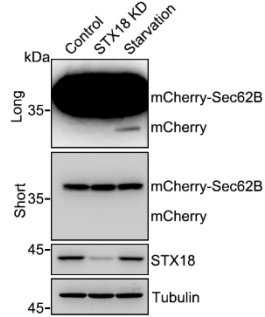

**f**

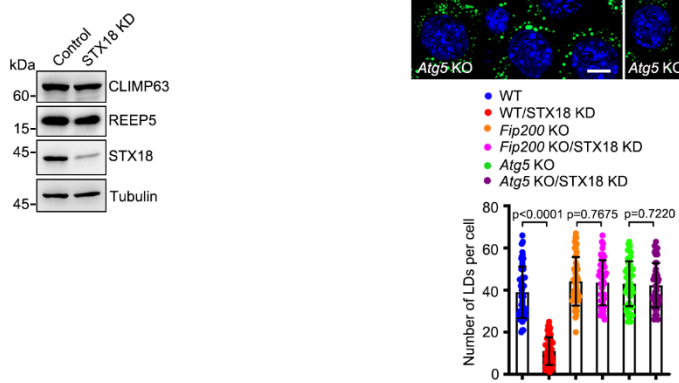

136 **Figure S6. Knockdown of STX18 induces lipophagy.**

137 **(a)** HeLa cells were transfected with indicated siRNAs for 48 h, and treated with 200  $\mu$ M  
138 OA for 6 h. LDs were labeled with BODIPY-493/503 (green). The nuclei were stained with  
139 DAPI. Cells were imaged by confocal microscopy. Scar bar represents 10  $\mu$ m. Number  
140 of LDs in each cell was counted from 50 cells of three independent experiments. Error  
141 bars, mean  $\pm$  SD. Two-tailed Unpaired Student's t-test. **(b)** *Penta* knockout HeLa cells  
142 were transfected with STX18 siRNA for 48 h and treated with 200  $\mu$ M OA for 6 h. LDs  
143 were labeled with BODIPY-493/503 (green). The nuclei were stained with DAPI. Cells  
144 were imaged by confocal microscopy. Scar bar represents 10  $\mu$ m. Number of LDs in each  
145 cell was counted from 20 cells of three independent experiments. Error bars, mean  $\pm$  SD.  
146 Two-tailed Unpaired Student's t-test. **(c)** HeLa cells were transfected with STX18 or/and  
147 HSC70 siRNA for 48 h and treated with 200  $\mu$ M OA for 6 h. LDs were labeled with  
148 BODIPY-493/503 (green). The nuclei were stained with DAPI. Cells were imaged by  
149 confocal microscopy. Scar bar represents 10  $\mu$ m. Number of LDs in each cell was counted  
150 from 20 cells of three independent experiments. Error bars, mean  $\pm$  SD. Two-tailed  
151 Unpaired Student's t-test. **(d)** WT, *Fip200* and *Atg5* KO MEF cells were transfected with  
152 si-STX18 for 48 h and treated with 200  $\mu$ M OA for 6 h. LDs were labeled with BODIPY-  
153 493/503 (green). The nuclei were stained with DAPI. Cells were imaged by confocal  
154 microscopy. Scar bar represents 10  $\mu$ m. Number of LDs in each cell was counted from  
155 50 cells of three independent experiments. Error bars, mean  $\pm$  SD. Two-tailed Unpaired  
156 Student's t-test. **(e)** HEK293T cells expressing mCherry-Sec62B were transfected with  
157 STX18 siRNA for 48 h or EBSS starvation for 12 h. Cell lysates were analyzed via western

158 blot. **(f)** HEK293T cells were transfected with STX18 siRNA for 48 h. Cell lysates were  
159 analyzed via western blot. Source data are provided as a Source Data file.



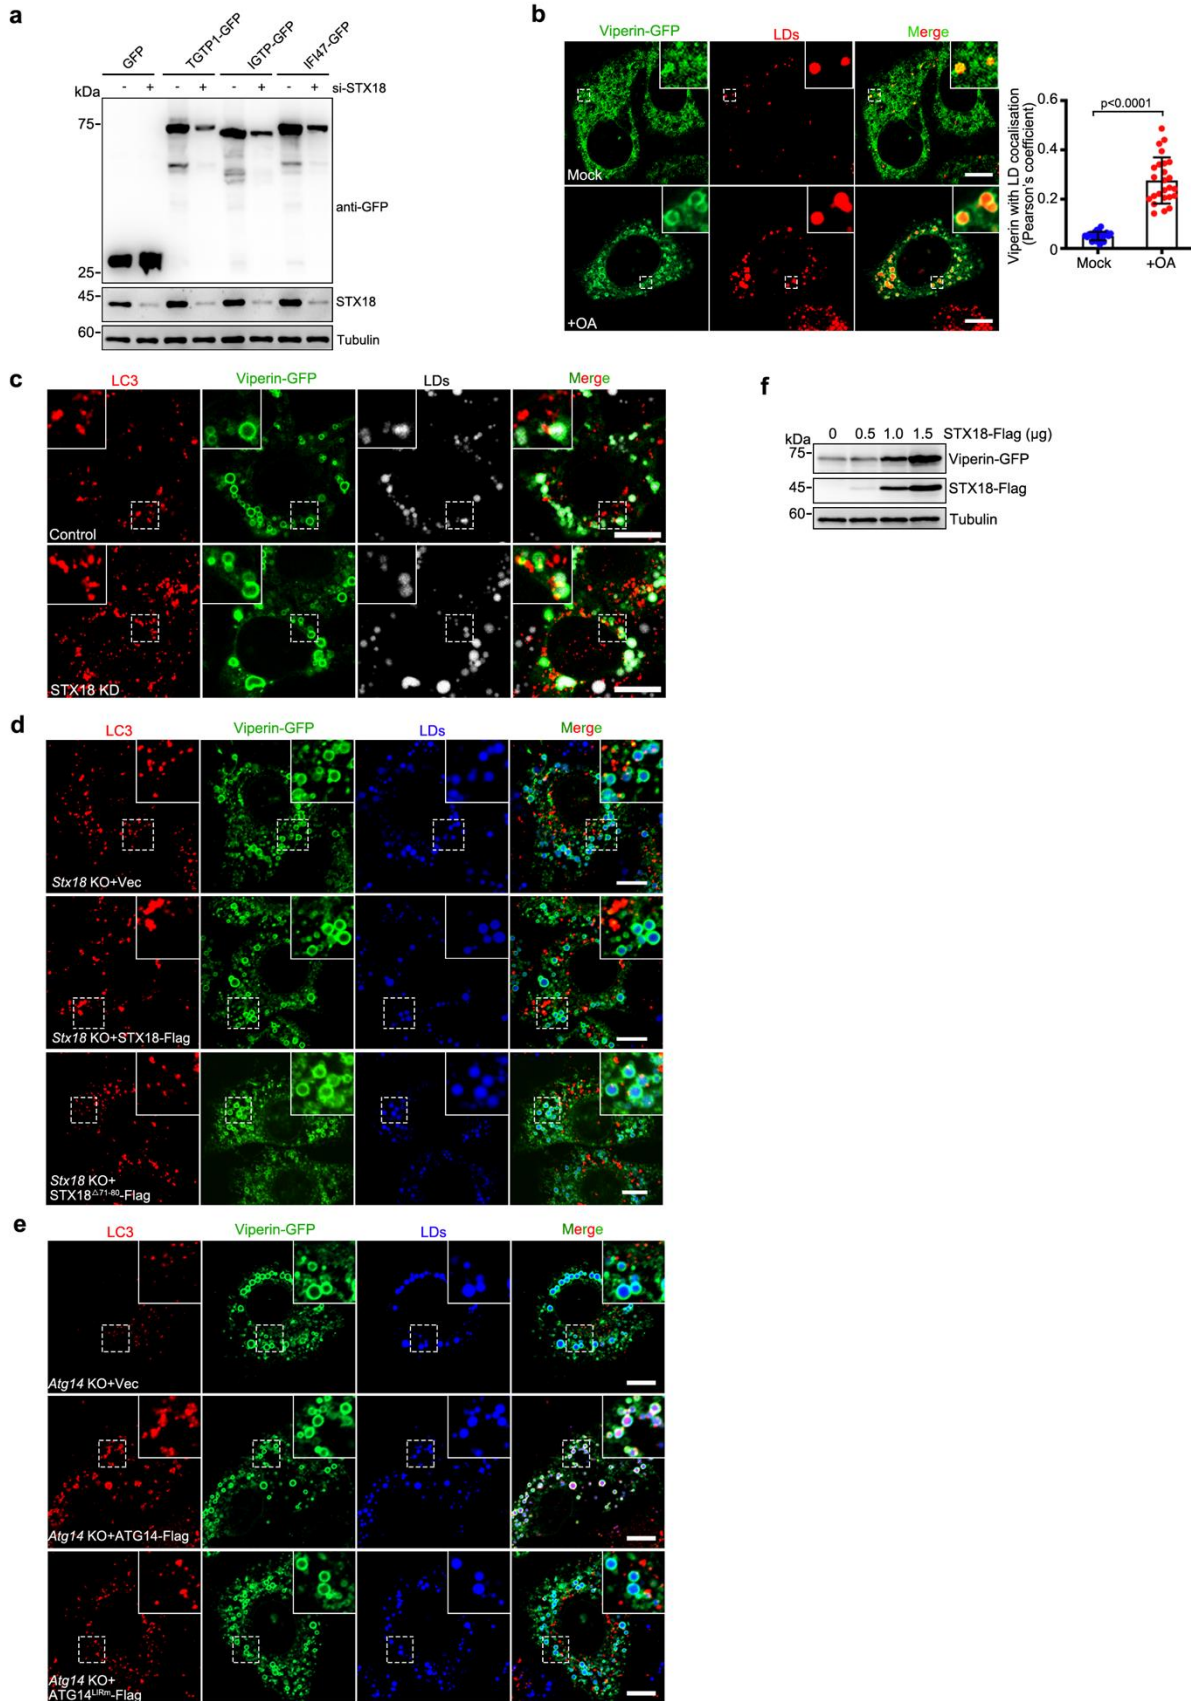

161 **Figure S7. STX18 regulates autophagic degradation of Viperin.**

162 **(a)** HeLa cells expressing GFP-vec, TGTP1-GFP, IGTP-GFP, or IFI47-GFP were  
163 transfected with STX18 siRNA for 48 h, and treated with 200  $\mu$ M OA for 12 h. Cell lysates  
164 were analyzed via western blot. **(b)** HeLa cells expressing Viperin-GFP were treated with  
165 or without 200  $\mu$ M OA for 12 h, then fixed and labeled the LDs with LipidTOX Red (red).  
166 Cells were imaged by confocal microscopy. Scar bar represents 10  $\mu$ m. Colocalization of  
167 LDs with Viperin-GFP (Pearson's Coefficient), n=25 cells. Error bars, mean  $\pm$  SD of three  
168 independent experiments. Two-tailed Unpaired Student's t-test. **(c)** HeLa cells expressing  
169 Viperin-GFP were treated with STX18 siRNA for 48 h. Meanwhile cells were treated with  
170 200  $\mu$ M OA for 12 h and 100  $\mu$ M CQ for 6 h, then fixed and immunostained with anti-LC3  
171 antibodies (red). LDs were labeled with LipidTOX Deep Red (white). **(d)** *Stx18* KO HeLa  
172 cells expressing Viperin-GFP were transfected with STX18-Flag or STX18 $\Delta$ <sup>71-80aa</sup>-Flag for  
173 24 h, cells were further treated with 200  $\mu$ M OA for 12 h and 100  $\mu$ M CQ for 6 h, then  
174 fixed and immunostained with anti-LC3 antibodies (red). LDs were labeled with LipidTOX  
175 Deep Red (blue). **(e)** *Atg14* KO HeLa cells expressing Viperin-GFP were transfected with  
176 ATG14-Flag or ATG14<sup>LIRm</sup>-Flag for 24 h, cells were further treated with 200  $\mu$ M OA for 12  
177 h and 100  $\mu$ M CQ for 6 h, then fixed and immunostained with anti-LC3 antibodies (red).  
178 LDs were labeled with LipidTOX Deep Red (blue). **(f)** HeLa cells were transfected with  
179 Viperin-GFP and STX18-Flag for 36 h and treated with 200  $\mu$ M OA for 12 h. Cell lysates  
180 were analyzed via western blot. Source data are provided as a Source Data file.

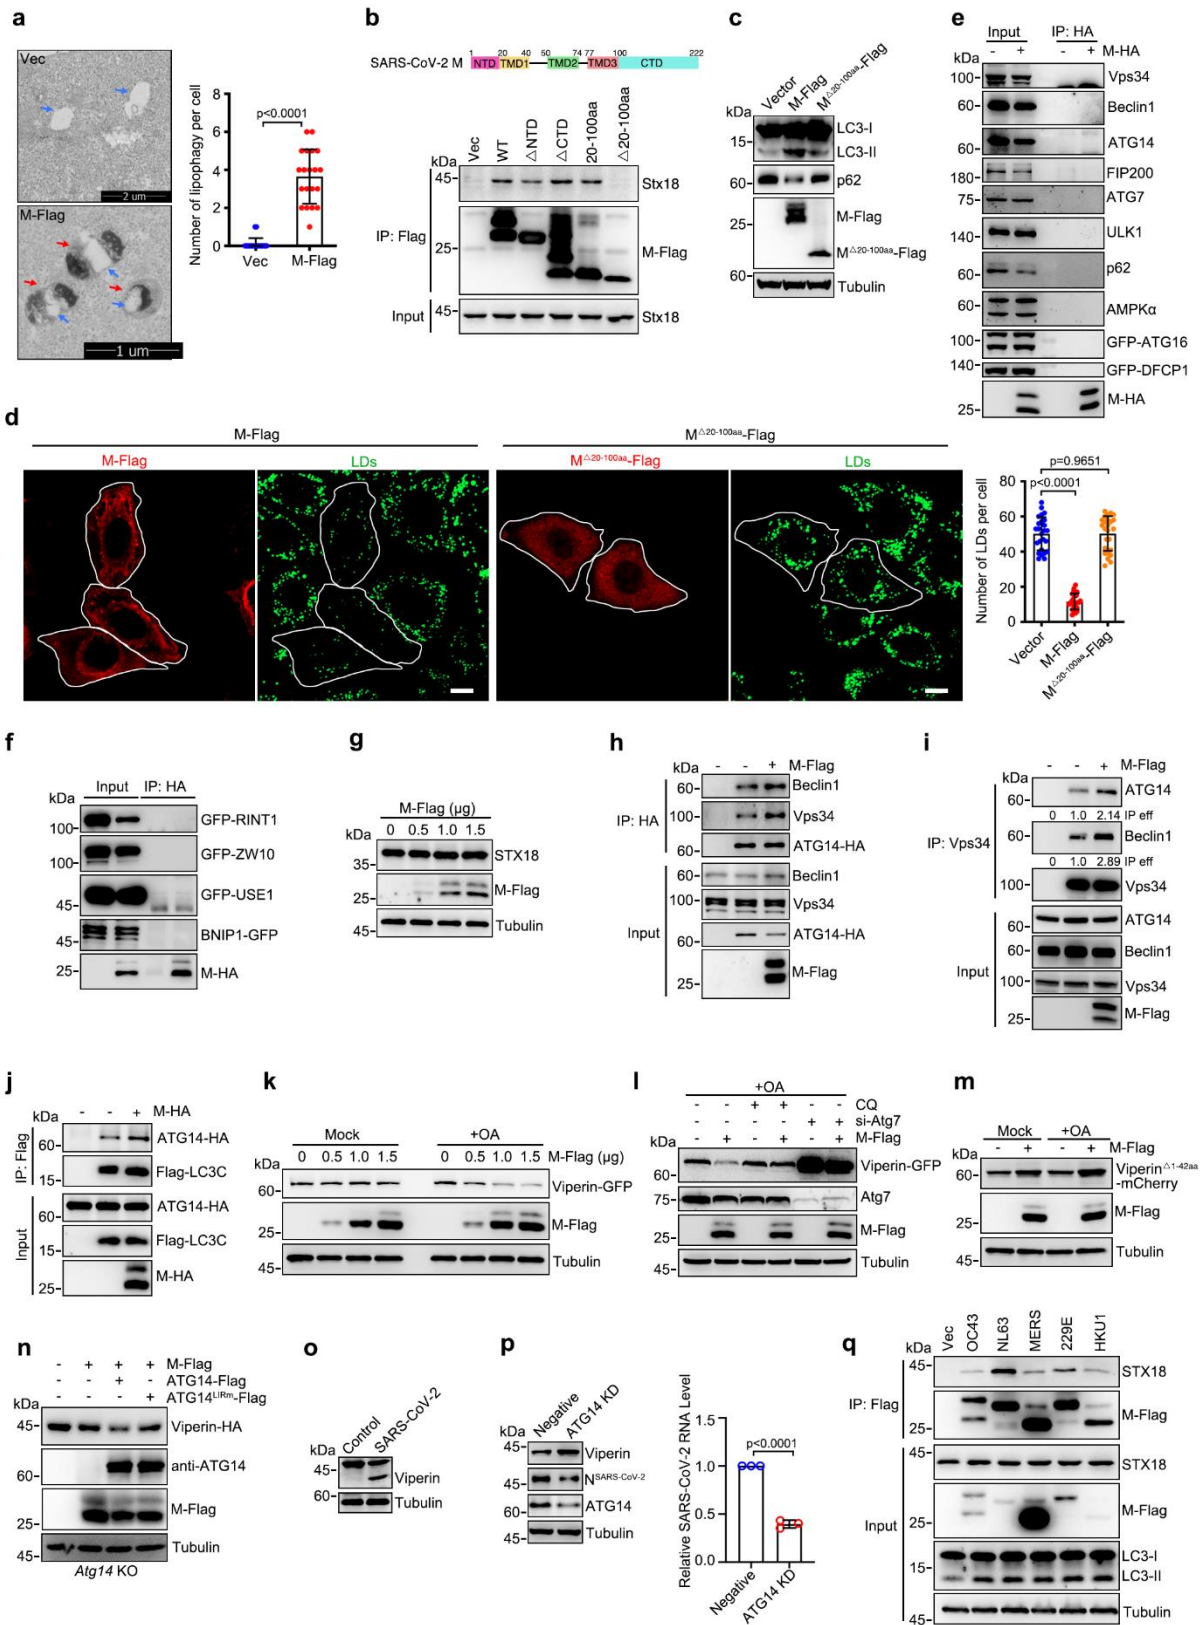

182 **Figure S8. SARS-CoV-2 M interacts with STX18 and induces autophagic**  
183 **degradation of Viperin.**

184 **(a)** Representative transmission electron micrograph of M overexpression cells. Blue  
185 arrows indicate LDs. Red arrows indicated autophagosome. The graph shows the  
186 quantification of lipophagy by analyzing the number of autophagosomes engulfed LDs  
187 per cell in 20 cells. Error bars, mean  $\pm$  SD of two independent experiments. Two-tailed  
188 Unpaired Student's t-test. **(b)** HEK293T cells were transfected with M-Flag or its mutants  
189 for 36 h. Cells were subjected to Flag IP and analyzed via western blot. **(c)** HEK293T  
190 cells were transfected with M-Flag or its mutant for 36 h. Cell lysates were analyzed via  
191 western blot. **(d)** HeLa cells expressing the M-Flag or M $\Delta^{20-100aa}$ -Flag were treated with  
192 200  $\mu$ M OA for 6 h, then fixed and immunostained with anti-Flag (red). LDs were labeled  
193 with BODIPY-493/503 (green). Cells were imaged by confocal microscopy. White ROIs  
194 indicate the cells expressing M protein. Scar bar represents 10  $\mu$ m. The number of LDs  
195 per cell was counted and shown at the right panel, n=25 cells. Error bars, mean  $\pm$  SD of  
196 three independent experiments. Two-tailed Unpaired Student's t-test. **(e)** HEK293T cells  
197 were transfected with M-HA, GFP-ATG16, and GFP-DFCP1 for 36 h. Protein interactions  
198 were detected by immunoprecipitation with anti-HA beads and immunoblotting analysis.  
199 **(f)** HEK293T cells were transfected with M-HA, GFP-RINT1, GFP-ZW10, GFP-USE1 and  
200 BNIP1-GFP for 36 h. Protein interactions were detected by immunoprecipitation with anti-  
201 HA beads and immunoblotting analysis. **(g)** HEK293T cells were transfected with M-Flag  
202 for 36 h. Cell lysates were analyzed via western blot. **(h)** HEK293T cells were transfected  
203 with ATG14-HA with or without M-Flag for 36 h. Protein interactions were detected by  
204 immunoprecipitation with anti-HA beads and immunoblotting analysis. **(i)** HEK293T cells

205 were transfected with or without M-Flag for 36 h. Cells were subjected to Vps34 IP and  
206 analyzed via western blot. **(j)** HEK293T cells were transfected with Flag-LC3C, ATG14-  
207 HA with or without M-HA for 36 h. Protein interactions were detected by  
208 immunoprecipitation with anti-Flag beads and immunoblotting analysis. **(k)** HeLa cells  
209 were transfected with Viperin-GFP and M-Flag for 36 h and treated with or without 200  
210  $\mu$ M OA for 12 h. Cell lysates were analyzed via western blot. **(l)** HeLa cells expressing  
211 Viperin-GFP with or without M-Flag were transfected with ATG7 siRNA for 48 h or treated  
212 with CQ for 6 h. Meanwhile, cells were treated with 200  $\mu$ M OA for 12 h. Cell lysates were  
213 analyzed via western blot. **(m)** HeLa cells expressing Viperin $\Delta^{1-42}$ -mCherry with or without  
214 M-Flag were treated with or without 200  $\mu$ M OA for 12 h. Cell lysates were analyzed via  
215 western blot. **(n)** *Atg14* knockout HeLa cells expressing Viperin-HA with M-Flag were  
216 transfected with ATG14-Flag or ATG14<sup>LIRm</sup>-Flag and treated with 200  $\mu$ M OA for 12 h.  
217 Cell lysates were analyzed via western blot. **(o)** Vero-E6 cells were infected with SARS-  
218 CoV-2. Cell lysates were analyzed via western blot. **(p)** Vero-E6 cells were transfected  
219 with indicated siRNAs for 24 h and infected with SARS-CoV-2 for 24 h. Meanwhile cells  
220 were treated with 200  $\mu$ M OA for 12 h. Cell lysates were analyzed via western blot. Viral  
221 RNA level was determined by RT-qPCR. Error bars, mean  $\pm$  SD of three independent  
222 experiments. Two-tailed Unpaired Student's t-test. **(q)** HEK293T cells were transfected  
223 with OC43 M-Flag, NL63 M-Flag, MERS M-Flag, 229E M-Flag, or HKU1 M-Flag for 36 h.  
224 Protein interactions were detected by immunoprecipitation with anti-Flag beads and  
225 immunoblotting analysis. Source data are provided as a Source Data file.
